# Supplementary material
Source: PubMed Central journal article supplement (PMC2900704)
Supplement: 1001749107_pnas.201001749SI.pdf [file 1001749107_pnas.201001749SI.pdf]

# Supporting Information

Vacca et al. 10.1073/pnas.1001749107

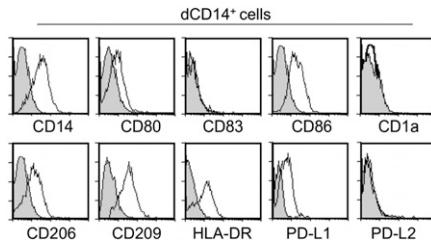

Fig. S1. Cytofluorimetric analysis of informative surface markers in freshly isolated dCD14<sup>+</sup> cells.

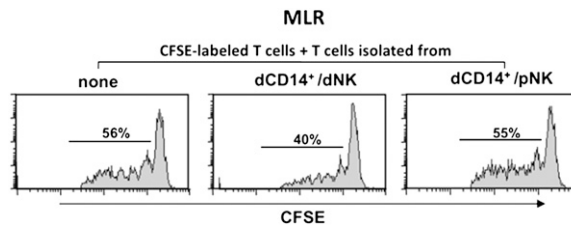

Fig. S2. CD4<sup>+</sup> T cells isolated from dCD14<sup>+</sup>/dNK cell cocultures exhibit suppressive capacity on T cell proliferation in MLR. CD4<sup>+</sup> T cells isolated from the indicated coculture combinations were added to allogeneic CFSE-labeled T cells and irradiated allogeneic peripheral blood mononuclear cells (PBMC) for 5 d to assess their ability to inhibit T cell proliferation. The percentages of proliferating cells are indicated. Data are representative of three independent experiments.

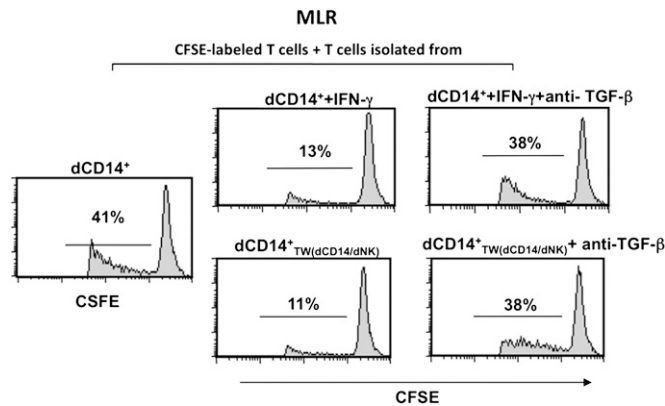

Fig. S3. (Upper) T cells isolated from cultures in which dCD14<sup>+</sup> cells were conditioned by IFN- $\gamma$  in the absence or in the presence of anti-TGF- $\beta$  mAb were added to allogeneic CFSE-labeled T cells and irradiated allogeneic PBMC. Their inhibitory capability was analyzed in a 5-d culture assay. The percentage of proliferating CFSE-labeled T cells is indicated. Data are representative of three independent experiments. (Lower) T cells isolated from cultures in which dCD14<sup>+</sup><sub>TW</sub> cells were conditioned by dNK + dCD14<sup>+</sup> cells in the absence or in the presence of anti-TGF- $\beta$  mAb were added to allogeneic CFSE-labeled T cells and irradiated allogeneic PBMCs. The inhibitory capability of T cells was analyzed in a 5-d culture assay. The percentage of proliferating CFSE-labeled T cells is indicated. Data are representative of three independent experiments.

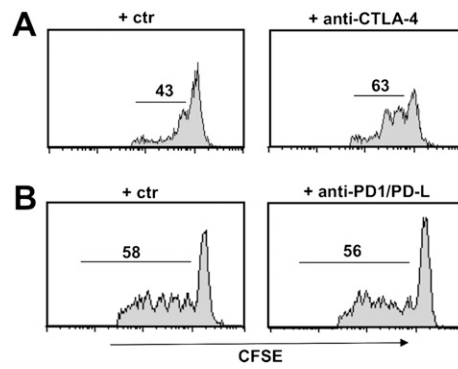

**Fig. 54.** Tregs that had been generated by coculture with dCD14<sup>+</sup>/dNK cells were harvested, purified, and further incubated with B7<sup>+</sup> cells (in this experiment we used dCD14<sup>+</sup> cells). The readout system was represented by anti-CD3-induced (CFSE-labeled) T cells. T cell proliferation was analyzed after 5 d in culture (A) in the presence or in the absence of anti-CTLA-4 neutralizing mAb or (B) in the presence of anti-PD1/PD-L neutralizing mAbs.
